# Supplementary material for: Sex Differences in the Behavioral, Molecular, and Structural Effects of Ketamine Treatment in Depression
Source: PubMed Central journal article supplement — Int J Neuropsychopharmacol. 2021 Nov 19;25(1):75–84. doi: 10.1093/ijnp/pyab082 (PMC8756094; doi:10.1093/ijnp/pyab082), 2021-11-19
Supplement: pyab082_suppl_supplementary_table_s1.pdf [file pyab082_suppl_supplementary_table_s1.pdf]

**Supplementary Table S1. Behavioural Effects of Ketamine in Preclinical Models**

| Citation                     | Animal | Strain         | M/F | Dose in mg/kg<br><i>Enantiomer</i>  | Stress<br>Model | Time of Testing<br>(after last injection)                           | Tests                            | Behavioural Responses, time<br>(dose)                                                                                                                                                                                    | Injection<br>Method | Special<br>Notes/Considerations                                                                                                                                                              |
|------------------------------|--------|----------------|-----|-------------------------------------|-----------------|---------------------------------------------------------------------|----------------------------------|--------------------------------------------------------------------------------------------------------------------------------------------------------------------------------------------------------------------------|---------------------|----------------------------------------------------------------------------------------------------------------------------------------------------------------------------------------------|
| (Autry et al., 2011)         | Mouse  | C57BL/6        | M   | 3<br><i>(R,S)-ketamine</i>          | Naïve           | 30min, 24h (FST)                                                    | FST                              | • FST: ↓ Immobility, 30min-24h                                                                                                                                                                                           | IP                  |                                                                                                                                                                                              |
| (Carrier and Kabbaj, 2013)   | Rat    | Sprague Dawley | M   | 2.5, 5, 10<br><i>(R,S)-ketamine</i> | Naïve           | 30min (FST)<br>30min (NSF)<br>30min (LDB)<br>24h (EPM)<br>48h (SPT) | FST<br>NSF<br>LDB<br>EPM<br>SPT  | • FST: ↓ Immobility (5, 10)<br>• NSF: ↓ Latency (5, 10)<br>• LDB: = Time spent and number of entries into light box<br>• EPM: = Time spent and number of entries into open arms<br>• SPT: ↑ Sucrose preference (5, 10)   | IP                  |                                                                                                                                                                                              |
| (Carrier and Kabbaj, 2013)   | Rat    | Sprague Dawley | F   | 2.5, 5, 10<br><i>(R,S)-ketamine</i> | Naïve           | 30min (FST)<br>30min (NSF)<br>30min (LDB)<br>24h (EPM)<br>48h (SPT) | FST<br>NSF<br>LDB<br>EPM<br>SPT  | • FST: ↓ Immobility (2.5, 5, 10)<br>• NSF: ↓ Latency (2.5, 5, 10)<br>• LDB: = Time spent and number of entries into light box<br>• EPM: = Time spent and number of entries into open arms<br>• SPT: = Sucrose preference | IP                  | Estrus cycle not taken into account.                                                                                                                                                         |
| (Chang et al., 2018)         | Mouse  | C57BL/6J       | M/F | 3, 10<br><i>(R)-ketamine</i>        | LPS             | 1h (LMT)<br>3h (FST)                                                | LMT<br>FST                       | • LMT: = Locomotion<br>• FST: ↓ Immobility (10)<br>No differences between M/F in terms of acute antidepressant response.                                                                                                 | IP                  | Estrus cycle not taken into account.                                                                                                                                                         |
| (Dossat et al., 2018)        | Mouse  | C57BL/6J       | M   | 1.5, 3<br><i>(R,S)-ketamine</i>     | Naïve           | 30min (FST)                                                         | FST                              | • FST: ↓ Immobility (3)                                                                                                                                                                                                  | IP                  |                                                                                                                                                                                              |
| (Dossat et al., 2018)        | Mouse  | C57BL/6J       | F   | 1.5, 3<br><i>(R,S)-ketamine</i>     | Naïve           | 30min (FST)                                                         | FST                              | • FST: ↓ Immobility (D1: 3; PE: 1.5, 3)                                                                                                                                                                                  | IP                  | Giving an ERα/β agonist was sufficient to increase behavioural sensitivity in D1 females. Increased sensitivity in PE is mirrored by activation of Akt in the PFC and Akt/CaMKIIα in the HC. |
| (Franceschelli et al., 2015) | Mouse  | C57BL/6J       | M   | 3, 5, 10<br><i>(R,S)-ketamine</i>   | Naïve           | 30min, 24h (FST)                                                    | FST                              | • FST: ↓ Immobility, 30min (5, 10)<br>• FST: ↓ Immobility, 24h (10)                                                                                                                                                      | IP                  |                                                                                                                                                                                              |
| (Franceschelli et al., 2015) | Mouse  | C57BL/6J       | F   | 3, 5, 10<br><i>(R,S)-ketamine</i>   | Naïve           | 30min, 24h (FST)                                                    | FST                              | • FST: ↓ Immobility, 30min (3, 5, 10)<br>• FST: ↓ Immobility, 24h (5, 10)                                                                                                                                                | IP                  | Estrus cycle not taken into account.                                                                                                                                                         |
| (Franceschelli et al., 2015) | Mouse  | C57BL/6J       | M   | 10<br><i>(R,S)-ketamine</i>         | CMS             | 30min (OFT)<br>1d, 7d (FST)<br>4d (MBT)<br>5d (SpIT)<br>6d (SPT)    | OFT<br>FST<br>MBT<br>SpIT<br>SPT | OFT: = Locomotor activity and center arena exploration<br>FST: ↓ Immobility, 1d-7d<br>MBT: = Number of marbles buried<br>SpIT: ↑ Grooming duration<br>SPT: = Sucrose preference                                          | IP                  |                                                                                                                                                                                              |

| Citation                     | Animal | Strain         | M/F | Dose in mg/kg<br><i>Enantiomer</i>                    | Stress<br>Model | Time of Testing<br>(after last injection)                                     | Tests                            | Behavioural Responses, time<br>(dose)                                                                                                                                                     | Injection<br>Method | Special<br>Notes/Considerations                                                                                               |
|------------------------------|--------|----------------|-----|-------------------------------------------------------|-----------------|-------------------------------------------------------------------------------|----------------------------------|-------------------------------------------------------------------------------------------------------------------------------------------------------------------------------------------|---------------------|-------------------------------------------------------------------------------------------------------------------------------|
| (Franceschelli et al., 2015) | Mouse  | C57BL/6J       | F   | 10<br><i>(R,S)-ketamine</i>                           | CMS             | 30min (OFT)<br>1d, 7d (FST)<br>4d (MBT)<br>5d (SplT)<br>6d (SPT)              | OFT<br>FST<br>MBT<br>SplT<br>SPT | OFT: ↓ Locomotor activity and center arena exploration<br>FST: ↓ Immobility, 1d<br>MBT: = Number of marbles buried<br>SplT: = Grooming duration<br>SPT: = Sucrose preference              | IP                  | Estrus cycle not taken into account.                                                                                          |
| (Garcia et al., 2008a)       | Rat    | Wistar         | M   | 5, 10, 15; 14d<br>Once Daily<br><i>(R,S)-ketamine</i> | Naïve           | Day 12 (OFT)<br>Day 13, 14 (FST)<br>All tests 60min after drug administration | FST<br>OFT                       | • FST: ↓ Immobility, ↑ Climbing, ↑ Swimming (5, 10, 15)<br>• OFT: = Number of rearings, = Number of crossings                                                                             | IP                  | Acute administration of 5mg/kg in rats is insufficient for a behavioural response, but it is sufficient in a chronic regimen. |
| (Garcia et al., 2008b)       | Rat    | Wistar         | M   | 5, 10, 15<br><i>(R,S)-ketamine</i>                    | Naïve           | 60min (FST)<br>60min (OFT)                                                    | FST<br>OFT                       | • FST: ↓ Immobility (10, 15)<br>• OFT: = Number of rearings, = Number of crossings                                                                                                        | IP                  |                                                                                                                               |
| (Garcia et al., 2009)        | Rat    | Wistar         | M   | 15; acute<br><i>(R,S)-ketamine</i>                    | Naïve           | 60min (SPT)                                                                   | SPT                              | • SPT: = Sucrose preference                                                                                                                                                               | IP                  |                                                                                                                               |
| (Garcia et al., 2009)        | Rat    | Wistar         | M   | 15; 7d<br>Once Daily<br><i>(R,S)-ketamine</i>         | Naïve           | 60min (SPT)                                                                   | SPT                              | • SPT: ↑ Sucrose preference                                                                                                                                                               | IP                  | Larger differences in chronic than acute ketamine administration.                                                             |
| (Garcia et al., 2009)        | Rat    | Wistar         | M   | 15; acute<br><i>(R,S)-ketamine</i>                    | CMS             | 60min (SPT)                                                                   | SPT                              | • SPT: = Sucrose preference                                                                                                                                                               | IP                  |                                                                                                                               |
| (Garcia et al., 2009)        | Rat    | Wistar         | M   | 15; 7d<br>Once Daily<br><i>(R,S)-ketamine</i>         | CMS             | 60min (SPT)                                                                   | SPT                              | • SPT: ↑ Sucrose preference                                                                                                                                                               | IP                  |                                                                                                                               |
| (Guo et al., 2016)           | Rat    | Sprague Dawley | M/F | 6-14; 9d<br>(Once daily)<br><i>(R,S)-ketamine</i>     | Naïve           | Day 9 (CPP)                                                                   | CPP                              | • CPP: ↑ Preference (NS)<br>Females more sensitive to the ketamine-induced CPP than males. Positive reinforcement agent in both sexes, but preference scores were much higher in females. | NS                  | Estrus cycle not taken into account.                                                                                          |
| (Iñiguez et al., 2018)       | Mouse  | C57BL/6J       | F   | 20<br>3 injections<br><i>(R,S)-ketamine</i>           | ES              | 30min (SIT)                                                                   | SIT                              | • SIT: ↑ Social interaction<br>• ES induced avoidance behaviour, which was rescued with ketamine                                                                                          | IP                  | Estrus cycle not taken into account.                                                                                          |
| (Li et al., 2010)            | Rat    | Sprague Dawley | M   | 10<br><i>(R,S)-ketamine</i>                           | IES             | 24h (FST)<br>24h (NSF)<br>24h (LH)<br>30min, 1h, 2h, 6h,                      | FST<br>NSF<br>LH                 | • FST: ↓ Immobility<br>• NSF: ↓ Latency to eat<br>• LH: ↓ Number of escape failures                                                                                                       | IP                  |                                                                                                                               |
| (Li et al., 2011)            | Rat    | Sprague Dawley | M   | 10<br><i>(R,S)-ketamine</i>                           | CUS             | 1d, 3d, 5d, 7d (SPT)<br>2d (NSF)                                              | SPT<br>NSF                       | • SPT: ↑ Sucrose preference, 3d-7d<br>• NSF: ↓ Latency                                                                                                                                    | IP                  |                                                                                                                               |

| Citation                  | Animal | Strain         | M/F | Dose in mg/kg<br><i>Enantiomer</i>                          | Stress<br>Model | Time of Testing<br>(after last injection) | Tests             | Behavioural Responses, time<br>(dose)                                                                                                                                                                                                              | Injection<br>Method | Special<br>Notes/Considerations                                                                                                                                                                                                         |
|---------------------------|--------|----------------|-----|-------------------------------------------------------------|-----------------|-------------------------------------------|-------------------|----------------------------------------------------------------------------------------------------------------------------------------------------------------------------------------------------------------------------------------------------|---------------------|-----------------------------------------------------------------------------------------------------------------------------------------------------------------------------------------------------------------------------------------|
| (McDougall et al., 2017)  | Rat    | Sprague Dawley | M/F | 5, 10, 20, 40<br><i>(R,S)-ketamine</i>                      | Naïve           | Immediate (LMT)                           | LMT               | <ul style="list-style-type: none"> <li>• LMT: ↑ Locomotion</li> <li>• Significantly more locomotor activity and motor disrupting effects in female adolescent rats than male adolescent rats injected with (20, 40).</li> </ul>                    | IP                  |                                                                                                                                                                                                                                         |
| (Saland et al., 2016)     | Rat    | Sprague Dawley | M   | 2.5; on days 4 and 6 (of 6)<br><i>(R,S)-ketamine</i>        | Naïve           | 24h-7d (SPT)<br>Tested once daily         | SPT               | <ul style="list-style-type: none"> <li>• SPT: = Sucrose preference</li> </ul>                                                                                                                                                                      | IP                  | Increase in sucrose preference (lasting 6 days) if given cyclic P4.                                                                                                                                                                     |
| (Saland et al., 2016)     | Rat    | Sprague Dawley | F   | 2.5; on days 4 and 6 (of 6)<br><i>(R,S)-ketamine</i>        | Naïve           | 24h-7d (SPT)<br>Tested once daily         | SPT               | <ul style="list-style-type: none"> <li>• SPT: ↑ Sucrose preference, 24h-7d</li> </ul>                                                                                                                                                              | IP                  | OVX animals with E2/P4 hormone replacement to physiological levels.                                                                                                                                                                     |
| (Sarkar and Kabbaj, 2016) | Rat    | Sprague Dawley | M   | 2.5, 5<br><i>(R,S)-ketamine</i>                             | CSIS            | 3h, 24h (SPT)<br>3d (FST)                 | SPT<br>FST        | <ul style="list-style-type: none"> <li>• SPT: ↑ Sucrose preference, 3h (5)</li> <li>• FST: ↓ Immobility (5)</li> </ul>                                                                                                                             | NS                  |                                                                                                                                                                                                                                         |
| (Sarkar and Kabbaj, 2016) | Rat    | Sprague Dawley | F   | 2.5, 5<br><i>(R,S)-ketamine</i>                             | CSIS            | 3h, 24h (SPT)<br>3d (FST)                 | SPT<br>FST        | <ul style="list-style-type: none"> <li>• SPT: = Sucrose preference</li> <li>• FST: ↓ Immobility (2.5, 5)</li> </ul>                                                                                                                                | NS                  | Females injected with ketamine during D1. No reduction in SPT after stress, but also no increase after ketamine.                                                                                                                        |
| (Schoepfer et al., 2019)  | Rat    | Sprague Dawley | M   | 2.5, 5, 10; 10d<br>Every other day<br><i>(R,S)-ketamine</i> | Naïve           | Day 11 (CPP)<br>Day 2, 12 (LMT)           | LMT<br>CPP        | <ul style="list-style-type: none"> <li>• LMT: ↑ Locomotion, day 12 (5, 10)</li> <li>• Locomotor response to 5mg/kg significantly smaller in males than females on day 12</li> <li>• CPP: ↑ Preference (10)</li> </ul>                              | IP                  |                                                                                                                                                                                                                                         |
| (Schoepfer et al., 2019)  | Rat    | Sprague Dawley | F   | 2.5, 5, 10; 10d<br>Every other day<br><i>(R,S)-ketamine</i> | Naïve           | Day 11 (CPP)<br>Day 2, 12 (LMT)           | LMT<br>CPP        | <ul style="list-style-type: none"> <li>• LMT: ↑ Locomotion, day 2 and 12 (5, 10)</li> <li>• Locomotor response to 5mg/kg significantly larger in females than males on day 12</li> <li>• CPP: = Preference</li> </ul>                              | IP                  | Females have more psychostimulant effects at an equivalent dose as males, but they have a lower threshold for antidepressant effects and therefore may be more tolerant to effects at lower doses. Estrus cycle not taken into account. |
| (Silvestre et al., 1997)  | Rat    | Wistar         | M   | 7<br><i>(R,S)-ketamine</i>                                  | Naïve           | 30min (EPM)<br>30min (SIT)<br>30min (HBT) | EPM<br>SIT<br>HBT | <ul style="list-style-type: none"> <li>• EPM: ↓ Time spent and number of entries into open arms</li> <li>• SIT: ↓ Interaction, ↓ Rearings, ↓ Activity in medial areas, ↓ Total central activity</li> <li>• HBT: ↑ Crossings, ↓ Rearings</li> </ul> | IP                  | Anxiogenic-like effects.                                                                                                                                                                                                                |

| Citation              | Animal | Strain             | M/F | Dose in mg/kg<br><i>Enantiomer</i>                                                                                               | Stress<br>Model | Time of Testing<br>(after last injection)                                                                            | Tests            | Behavioural Responses, time<br>(dose)                                                                                                                                                                                     | Injection<br>Method | Special<br>Notes/Considerations                                                                                                    |
|-----------------------|--------|--------------------|-----|----------------------------------------------------------------------------------------------------------------------------------|-----------------|----------------------------------------------------------------------------------------------------------------------|------------------|---------------------------------------------------------------------------------------------------------------------------------------------------------------------------------------------------------------------------|---------------------|------------------------------------------------------------------------------------------------------------------------------------|
| (Strong et al., 2017) | Rat    | Sprague Dawley     | M   | 2.5, 5; 1/wk for 7 wk<br><i>(R,S)-ketamine</i>                                                                                   | Naïve           | Immediate (LMT)<br>3-4d (CPP)<br>2wk (Ketamine challenge using escalating doses of 0, 2.5, and 5mg/kg every 30 mins) | LMT<br>CPP<br>KC | <ul style="list-style-type: none"> <li>• LMT: ↑ Locomotion, 10min (2.5, 5)</li> <li>• KC: Locomotor sensitization when treated with (5) and challenged with (5)</li> <li>• CPP: = Preference</li> </ul>                   | IP                  |                                                                                                                                    |
| (Strong et al., 2017) | Rat    | Sprague Dawley     | F   | 2.5, 5; 1/wk for 7 wk<br><i>(R,S)-ketamine</i>                                                                                   | Naïve           | Immediate (LMT)<br>3-4d (CPP)<br>2wk (Ketamine challenge using escalating doses of 0, 2.5, and 5mg/kg every 30 mins) | LMT<br>CPP<br>KC | <ul style="list-style-type: none"> <li>• LMT: ↑ Locomotion, 10min-20min (2.5)</li> <li>• KC: Locomotor sensitization when treated with (2.5, 5) and challenged with (5)</li> <li>• CPP: ↓ Preference (5) (CPA)</li> </ul> | IP                  | All females were tested in D1.                                                                                                     |
| (Thelen et al., 2016) | Mouse  | C57BL/6J           | M   | 3, 5, 10; 21 d<br>Once daily<br><i>(R,S)-ketamine</i>                                                                            | Naïve           | Day 15 (OFT)<br>Day 22 (FST)                                                                                         | OFT<br>FST       | <ul style="list-style-type: none"> <li>• OFT: = Center arena exploration</li> <li>• FST: ↓ Immobility (10)</li> </ul>                                                                                                     | IP                  |                                                                                                                                    |
| (Thelen et al., 2016) | Mouse  | C57BL/6J           | F   | 3, 5, 10; 21 d<br>Once daily<br><i>(R,S)-ketamine</i>                                                                            | Naïve           | Day 15 (OFT)<br>Day 22 (FST)                                                                                         | OFT<br>FST       | <ul style="list-style-type: none"> <li>• OFT: ↓ Center arena exploration (5, 10)</li> <li>• FST: ↑ Immobility (10)</li> </ul>                                                                                             | IP                  | Repeated ketamine induced anxiety-like and depressive-like effects in females, but not males. Estrus cycle not taken into account. |
| (Tizabi et al., 2012) | Rat    | Wistar-Kyoto (WKY) | F   | 2.5, 5.0<br><i>(R,S)-ketamine</i>                                                                                                | Naïve           | 20min, 1wk (FST)<br>20min, 1wk (OFLA)                                                                                | FST<br>OFLA      | <ul style="list-style-type: none"> <li>• FST: ↓ Immobility, 20min (2.5, 5)</li> <li>• FST: ↓ Immobility, 20min-1wk (5)</li> <li>• OFLA: = Locomotor activity</li> </ul>                                                   | IP                  |                                                                                                                                    |
| (Tizabi et al., 2012) | Rat    | Wistar             | F   | 2.5, 5.0<br><i>(R,S)-ketamine</i>                                                                                                | Naïve           | 20min, 1wk (FST)<br>20min, 1wk (OFLA)                                                                                | FST<br>OFLA      | <ul style="list-style-type: none"> <li>• FST: = Immobility</li> <li>• OFT: = Locomotor activity</li> </ul>                                                                                                                | IP                  |                                                                                                                                    |
| (Tizabi et al., 2012) | Rat    | Wistar-Kyoto (WKY) | F   | 0.5, 2.5; 10d<br>Once daily<br><i>(R,S)-ketamine</i>                                                                             | Naïve           | 20-22h, 1wk (FST)<br>20-22h, 1wk (OFLA)                                                                              | FST<br>OFLA      | <ul style="list-style-type: none"> <li>• FST: ↓ Immobility 20-22h (0.5, 2.5)</li> <li>• FST↓ Immobility, 20-22h-1wk (2.5)</li> <li>• OFLA: = Locomotor activity</li> </ul>                                                | IP                  |                                                                                                                                    |
| (Tizabi et al., 2012) | Rat    | Wistar             | F   | 0.5, 2.5; 10d<br>Once daily<br><i>(R,S)-ketamine</i>                                                                             | Naïve           | 20-22h, 1wk (FST)<br>20-22h, 1wk (OFLA)                                                                              | FST<br>OFLA      | <ul style="list-style-type: none"> <li>• FST: = Immobility</li> <li>• OFLA: = Locomotor activity</li> </ul>                                                                                                               | IP                  |                                                                                                                                    |
| (Wright et al., 2017) | Rat    | Sprague Dawley     | M   | <u>Self-administration:</u><br>0.1/infusion (every 4 days; 10 sessions)<br><u>Reinstatement:</u><br>2.5<br><i>(R,S)-ketamine</i> | Naïve           | Daily extinction training. Once established, reinstatement dose administered immediately before session.             |                  | Reinstated ketamine-seeking behaviours after extinction when exposed to drug-paired cues alone or ketamine+cues.                                                                                                          | IV<br>IP            | Self-administration. The cues alone were enough to reinstate drug seeking behaviours in males.                                     |

| Citation              | Animal | Strain         | M/F | Dose in mg/kg<br><i>Enantiomer</i>                                                                                                                  | Stress Model | Time of Testing<br>(after last injection)                                                                | Tests                    | Behavioural Responses, time<br>(dose)                                                                                                                                                                                                                                                                                                                                                                                                       | Injection Method | Special Notes/Considerations                                                                                                                                                                                                                                                          |
|-----------------------|--------|----------------|-----|-----------------------------------------------------------------------------------------------------------------------------------------------------|--------------|----------------------------------------------------------------------------------------------------------|--------------------------|---------------------------------------------------------------------------------------------------------------------------------------------------------------------------------------------------------------------------------------------------------------------------------------------------------------------------------------------------------------------------------------------------------------------------------------------|------------------|---------------------------------------------------------------------------------------------------------------------------------------------------------------------------------------------------------------------------------------------------------------------------------------|
| (Wright et al., 2017) | Rat    | Sprague Dawley | F   | <u>Self-administration:</u><br>0.1/infusion<br>(every 4 days;<br>10 sessions)<br><u>Reinstatement:</u><br>2.5<br><i>(R,S)-ketamine</i>              | Naïve        | Daily extinction training. Once established, reinstatement dose administered immediately before session. |                          | Diestrus trained: failed to acquire ketamine self-administration after ketamine/drug-paired cue exposure and rapidly decrease intake.<br>Proestrus trained: Reinstated ketamine-seeking behaviours after extinction when exposed to drug-paired cues alone or ketamine+cues.                                                                                                                                                                | IV<br>IP         | Self-administration.<br>Females lavaged for estrus staging.<br>The cues alone were enough to reinstate drug seeking behaviours in PE-trained, but not D1-trained, animals                                                                                                             |
| (Yang et al., 2015)   | Mouse  | C57BL/6        | M   | 10<br><i>(R)-ketamine</i><br><i>(S)-ketamine</i>                                                                                                    | SDS          | 1d, 6d (SPT)<br>2d, 7d (TST)<br>2d, 7d (FST)                                                             | SPT<br>TST<br>FST        | <ul style="list-style-type: none"> <li>• SPT: ↑ Sucrose preference, 1d-6d</li> <li>• TST: ↓ Immobility, 2d-7d</li> <li>• FST: ↓ Immobility, 2d-7d</li> </ul> (R)- and (S)-ketamine both work, but (R)-ketamine has a greater effect in all tests.                                                                                                                                                                                           | IP               | R-ketamine more potent than S-ketamine.<br>(S)-ketamine increases locomotion, has psychomimetic effects, and induces CPP, where (R)-ketamine doesn't seem to do any of those things in mice.<br>(R)-ketamine may be free of psychomimetic side effects and abuse liability in humans. |
| (Yang et al., 2015)   | Mouse  | C57BL/6        | M   | 5, 10, 20, 7d (CPP)<br>On days 1, 3, 5<br><i>(R)-ketamine</i><br>(5, 10, 20)<br><i>(S)-ketamine</i><br>(5, 10, 20)<br><i>(R,S)-ketamine</i><br>(10) | SDS          | 7d                                                                                                       | LMT<br>PPI<br>CPP        | <i>(S)-ketamine</i> <ul style="list-style-type: none"> <li>• LMT: ↑ Locomotion (5, 10, 20)</li> <li>• PPI: Deficits at 77db and 71db (10, 20)</li> <li>• CPP: ↑ Preference (5, 10, 20)</li> </ul> <i>(R)-ketamine</i> <ul style="list-style-type: none"> <li>• LMT: = Locomotion</li> <li>• PPI: Normal</li> <li>• CPP: = Preference</li> </ul> <i>(R,S)-ketamine</i> <ul style="list-style-type: none"> <li>• CPP: ↑ Preference</li> </ul> | IP               | R-ketamine more potent than S-ketamine.<br>(S)-ketamine increases locomotion, has psychomimetic effects, and induces CPP, where (R)-ketamine doesn't seem to do any of those things in mice.<br>(R)-ketamine may be free of psychomimetic side effects and abuse liability in humans. |
| (Yang et al., 2015)   | Rat    | Sprague Dawley | M   | 20<br><i>(R)-ketamine</i><br><i>(S)-ketamine</i>                                                                                                    | US           | 5d (LH)                                                                                                  | LH                       | LH: ↓ Escape latency and number of failures, (R)-ketamine only, (S)-ketamine had no effect on LH                                                                                                                                                                                                                                                                                                                                            | IP               | (R)-ketamine, but not (S)-ketamine has an AD effect in a rat LH model.                                                                                                                                                                                                                |
| (Yang et al., 2018)   | Mouse  | C57BL/6        | M   | 10<br><i>(R)-ketamine</i>                                                                                                                           | CSDS         | 1d (TST)<br>1d (FST)<br>7d (SPT)                                                                         | LMT<br>TST<br>FST<br>SPT | <ul style="list-style-type: none"> <li>• LMT: = Locomotion</li> <li>• TST: ↓ Immobility</li> <li>• FST: ↓ Immobility</li> <li>• SPT: ↑ Sucrose preference</li> </ul>                                                                                                                                                                                                                                                                        | IP               |                                                                                                                                                                                                                                                                                       |

| Citation             | Animal | Strain   | M/F | Dose in mg/kg<br>Enantiomer                                 | Stress Model | Time of Testing<br>(after last injection)      | Tests                    | Behavioural Responses, time<br>(dose)                                                                                                                                                                                                                                                                                                                                                                                                    | Injection Method | Special Notes/Considerations                                                                                                                                                                                                 |
|----------------------|--------|----------|-----|-------------------------------------------------------------|--------------|------------------------------------------------|--------------------------|------------------------------------------------------------------------------------------------------------------------------------------------------------------------------------------------------------------------------------------------------------------------------------------------------------------------------------------------------------------------------------------------------------------------------------------|------------------|------------------------------------------------------------------------------------------------------------------------------------------------------------------------------------------------------------------------------|
| (Yang et al., 2018)  | Mouse  | C57BL/6  | M   | 10<br>(S)-ketamine                                          | CSDS         | 1d (TST)<br>1d (FST)<br>7d (SPT)               | LMT<br>TST<br>FST<br>SPT | <ul style="list-style-type: none"> <li>• LMT: = Locomotion</li> <li>• TST: ↓ Immobility</li> <li>• FST: ↓ Immobility</li> <li>• SPT: ↑ Sucrose preference</li> </ul>                                                                                                                                                                                                                                                                     | IP               |                                                                                                                                                                                                                              |
| (Zanos et al., 2016) | Mouse  | C57BL/6J | M/F | 1, 3, 10, 30, 50<br>(FST)<br>10 (LH)<br>(R,S)-ketamine      | CSDS         | 1h, 24h (FST)<br>1d (LH)                       | FST<br>LH                | <ul style="list-style-type: none"> <li>• FST: ↓ Immobility time, 1h (10, 30) (M/F grouped)</li> <li>• FST: ↓ Immobility time, 24h (10) (M/F grouped)</li> <li>• LH: ↓ Number of escape failures</li> </ul> <p>For males at 24 hours, only (10) reduced immobility in the FST, but both (3) and (10) reduced immobility in females.</p> <ul style="list-style-type: none"> <li>• Greater antidepressant potency in female mice</li> </ul> | IP               | Deuterated ketamine (which only affects its metabolism into HNK) did not induce AD effects in the FST or LH at 24h, suggesting a role of (2S,6S;2R,6R)-HNK in the sustained effects.<br>Estrus cycle not taken into account. |
| (Zanos et al., 2016) | Mouse  | C57BL/6J | M/F | 1, 3, 10, 30<br>(FST, NSF)<br>1, 5, 25 (LH)<br>(R)-ketamine | CSDS         | 1h, 24h (FST)<br>30min, 60min (NSF)<br>1d (LH) | FST<br>NSF<br>LH         | <ul style="list-style-type: none"> <li>• FST: ↓ Immobility, 1h (3, 10, 30)</li> <li>• FST: ↓ Immobility, 24h (10, 30)</li> <li>• LH: ↓ Number of escape failures (5, 25)</li> <li>• NSF: ↓ Latency</li> </ul>                                                                                                                                                                                                                            | IP               | Greater potency of (R)-ketamine in the FST, NSF, and LH.<br>Estrus cycle not taken into account.                                                                                                                             |
| (Zanos et al., 2016) | Mouse  | C57BL/6J | M/F | 1, 3, 10, 30<br>(S)-ketamine                                | CSDS         | 1h, 24h (FST)<br>30min, 60min (NSF)<br>1d (LH) | FST<br>NSF<br>LH         | <ul style="list-style-type: none"> <li>• FST: ↓ Immobility, 1h (30)</li> <li>• FST: = Immobility, 24h</li> <li>• LH: ↓ Number of escape failures (25)</li> </ul>                                                                                                                                                                                                                                                                         | IP               | Greater potency of (R)-ketamine in the FST, NSF, and LH.<br>Estrus cycle not taken into account.                                                                                                                             |
| (Zanos et al., 2016) | Mouse  | C57BL/6J | M/F | 3, 10 (FST)<br>10 (LH)<br>(2R,6R)-HNK<br>(2S,6S)-HNK        | CSDS         | 24h (FST)<br>1d (LH)                           | FST<br>LH                | <p>(2R,6R)-HNK</p> <ul style="list-style-type: none"> <li>• FST: ↓ Immobility (10)</li> <li>• LH: ↓ Number of escape failures</li> </ul> <p>(2S,6S)-HNK</p> <ul style="list-style-type: none"> <li>• FST: = Immobility</li> <li>• LH: = Number of escape failures</li> </ul>                                                                                                                                                             | IP               | (2R,6R)-HNK more potent than (2S,6S)-HNK.<br>(2R,6R)-HNK lacks ketamine's side effects.<br>Estrus cycle not taken into account.                                                                                              |

### List of Abbreviations

---

| Behavioural Test Abbreviations      | Stress Model Abbreviations            | Other Abbreviations                                  |
|-------------------------------------|---------------------------------------|------------------------------------------------------|
| CPA: Conditioned Place Aversion     | CMS: Chronic Mild Stress              | (m)(dl)PFC: (medial)(dorsolateral) Prefrontal Cortex |
| CPP: Conditioned Place Preference   | CSDS: Chronic Social Defeat Stress    | D1: Diestrus                                         |
| EPM: Elevated Plus Maze             | CSIS: Chronic Social Isolation Stress | HC: Hippocampus                                      |
| FST: Forced Swim Test               | CUS: Chronic Unpredictable Stress     | IP: Intraperitoneal                                  |
| HBT: Holeboard Test                 | ES: Emotional/Psychological Stress    | IV: Intravenous                                      |
| KC: Ketamine Challenge              | IES: Inescapable Shock                | NAcC: Nucleus Accumbens Core                         |
| LDB: Light-Dark Box                 | LPS: Lipopolysaccharide Inflammation  | NAcSh: Nucleus Accumbens Shell                       |
| LMT: Locomotor test                 | SDS: Social Defeat Stress             | NS: Not Specified                                    |
| MBT: Marble Burying Test            | US: Uncontrollable Stress             | PE: Proestrus                                        |
| NSF: Novelty Suppressed Feeding     |                                       |                                                      |
| OFLA: Open Field Locomotor Activity |                                       |                                                      |
| OFT: Open Field Test                |                                       |                                                      |
| PPI: Pre-Pulse Inhibition           |                                       |                                                      |
| SIT: Social Interaction Test        |                                       |                                                      |
| SplT: Splash Test                   |                                       |                                                      |
| SPT: Sucrose Preference Test        |                                       |                                                      |
| TST: Tail Suspension Test           |                                       |                                                      |

---

## References

- Autry AE, Adachi M, Nosyreva E, Na ES, Los MF, Cheng P, Kavalali ET, Monteggia LM (2011) NMDA receptor blockade at rest triggers rapid behavioural antidepressant responses. *Nature* 475:91–95.
- Carrier N, Kabbaj M (2013) Sex differences in the antidepressant-like effects of ketamine. *Neuropharmacology* 70:27–34.
- Chang L, Toki H, Qu Y, Fujita Y, Mizuno-Yasuhira A, Yamaguchi J-I, Chaki S, Hashimoto K (2018) No Sex-Specific Differences in the Acute Antidepressant Actions of (R)-Ketamine in an Inflammation Model. *Int J Neuropsychopharmacol* 21:932–937.
- Dossat AM, Wright KN, Strong CE, Kabbaj M (2018) Behavioral and biochemical sensitivity to low doses of ketamine: influence of estrous cycle in C57BL/6 mice. *Neuropharmacology* 130:30–41.
- Franceschelli A, Sens J, Herchick S, Thelen C, Pitychoutis PM (2015) Sex differences in the rapid and the sustained antidepressant-like effects of ketamine in stress-naïve and “depressed” mice exposed to chronic mild stress. *Neuroscience* 290:49–60.
- Garcia LS, Comim CM, Valvassori SS, Réus GZ, Andreazza AC, Stertz L, Fries GR, Gavioli EC, Kapczinski F, Quevedo J (2008a) Chronic Administration of Ketamine Elicits Antidepressant-Like Effects in Rats without Affecting Hippocampal Brain-Derived Neurotrophic Factor Protein Levels. *Basic Clin Pharmacol Toxicol* 103:502–506.
- Garcia LS, Comim CM, Valvassori SS, Réus GZ, Barbosa LM, Andreazza AC, Stertz L, Fries GR, Gavioli EC, Kapczinski F, Quevedo J (2008b) Acute administration of ketamine induces antidepressant-like effects in the forced swimming test and increases BDNF levels in the rat hippocampus. *Prog Neuro-Psychopharmacol Biol Psychiatry* 32:140–144.
- Garcia LS, Comim CM, Valvassori SS, Réus GZ, Stertz L, Kapczinski F, Gavioli EC, Quevedo J (2009) Ketamine treatment reverses behavioral and physiological alterations induced by chronic mild stress in rats. *Prog Neuro-Psychopharmacol Biol Psychiatry* 33:450–455.
- Guo R, Tang Q, Ye Y, Lu X, Chen F, Dai X, Yan Y, Liao L (2016) Effects of gender on ketamine-induced conditioned place preference and urine metabolomics. *Regul Toxicol Pharmacol* 77:263–274.



- Iñiguez SD, Flores-Ramirez FJ, Riggs LM, Alipio JB, Garcia I, Hernandez MA, Sanchez DO, Lobo MK, Serrano PA, Braren SH, Castillo SA (2018) Vicarious Social Defeat Stress Induces Depression-related Outcomes in Female Mice. *Biol Psychiatry* 83:9–17.
- Li N, Lee B, Liu R-J, Banasr M, Dwyer JM, Iwata M, Li X-Y, Aghajanian G, Duman RS (2010) mTOR-dependent synapse formation underlies the rapid antidepressant effects of NMDA antagonists. *Science* 329:959–964.
- Li N, Liu R-J, Dwyer JM, Banasr M, Lee B, Son H, Li X-Y, Aghajanian G, Duman RS (2011) Glutamate NMDA receptor antagonists rapidly reverse behavioral and synaptic deficits caused by chronic stress exposure. *Biol Psychiatry* 69:754–761.
- McDougall SA, Moran AE, Baum TJ, Apodaca MG, Real V (2017) Effects of ketamine on the unconditioned and conditioned locomotor activity of preadolescent and adolescent rats: impact of age, sex, and drug dose. *Psychopharmacology* 234:2683–2696.
- Saland SK, Schoepfer KJ, Kabbaj M (2016) Hedonic sensitivity to low-dose ketamine is modulated by gonadal hormones in a sex-dependent manner. *Sci Rep* 6:21322.
- Sarkar A, Kabbaj M (2016) Sex Differences in Effects of Ketamine on Behavior, Spine Density, and Synaptic Proteins in Socially Isolated Rats. *Biol Psychiatry* 80:448–456.
- Schoepfer KJ, Strong CE, Saland SK, Wright KN, Kabbaj M (2019) Sex- and dose-dependent abuse liability of repeated subanesthetic ketamine in rats. *Physiol Behav* 203:60–69.
- Silvestre JS, Nadal R, Pallarés M, Ferré N (1997) Acute effects of ketamine in the holeboard, the elevated-plus maze, and the social interaction test in Wistar rats. *Depress Anxiety* 5:29–33.
- Strong CE, Schoepfer KJ, Dossat AM, Saland SK, Wright KN, Kabbaj M (2017) Locomotor sensitization to intermittent ketamine administration is associated with nucleus accumbens plasticity in male and female rats. *Neuropharmacology* 121:195–203.
- Thelen C, Sens J, Mauch J, Pandit R, Pitychoutis PM (2016) Repeated ketamine treatment induces sex-specific behavioral and neurochemical effects in mice. *Behav Brain Res* 312:305–312.

- Tizabi Y, Bhatti BH, Manaye KF, Das JR, Akinfiresoye L (2012) Antidepressant-like effects of low ketamine dose is associated with increased hippocampal AMPA/NMDA receptor density ratio in female Wistar-Kyoto rats. *Neuroscience* 213:72–80.
- Wright KN, Strong CE, Addonizio MN, Brownstein NC, Kabbaj M (2017) Reinforcing properties of an intermittent, low dose of ketamine in rats: effects of sex and cycle. *Psychopharmacology* 234:393–401.
- Yang C, Ren Q, Qu Y, Zhang J-C, Ma M, Dong C, Hashimoto K (2018) Mechanistic Target of Rapamycin–Independent Antidepressant Effects of (R)-Ketamine in a Social Defeat Stress Model. *Biol Psychiatry* 83:18–28.
- Yang C, Shirayama Y, Zhang J-C, Ren Q, Yao W, Ma M, Dong C, Hashimoto K (2015) R-ketamine: a rapid-onset and sustained antidepressant without psychotomimetic side effects. *Transl Psychiatry* 5:e632–e632.
- Zanos P et al. (2016) NMDAR inhibition-independent antidepressant actions of ketamine metabolites. *Nature* 533:481–486.
