# Supplementary material for: Sex Differences in the Behavioral, Molecular, and Structural Effects of Ketamine Treatment in Depression
Source: PubMed Central journal article supplement — Int J Neuropsychopharmacol. 2021 Nov 19;25(1):75–84. doi: 10.1093/ijnp/pyab082 (PMC8756094; doi:10.1093/ijnp/pyab082), 2021-11-19
Supplement: pyab082_suppl_supplementary_table_s2.pdf [file pyab082_suppl_supplementary_table_s2.pdf]

**Supplementary Table S2. Molecular Effects of Ketamine in Preclinical Models**

| Citation                   | Animal | Strain         | M/F | Dose in mg/kg<br><i>Enantiomer</i> | Stress<br>Model | Time of Testing<br>(after last injection) | Molecular Changes,<br>time (dose)                                                                                                                                                                                                               | Injection<br>Method | Tissue Collection<br>Method        | Special<br>Notes/Considerations                                                                                                                                                                                                                       |
|----------------------------|--------|----------------|-----|------------------------------------|-----------------|-------------------------------------------|-------------------------------------------------------------------------------------------------------------------------------------------------------------------------------------------------------------------------------------------------|---------------------|------------------------------------|-------------------------------------------------------------------------------------------------------------------------------------------------------------------------------------------------------------------------------------------------------|
| (Autry et al., 2011)       | Mouse  | C57BL/6        | M   | 3<br><i>(R,S)-ketamine</i>         | Naïve           | 30min, 24h                                | <i>mPFC</i><br>• ↑ BDNF, 30min<br>• = GluR1<br>• = p-p70S6K<br>• = p-mTOR<br>• = p-eEF2<br><i>HC</i><br>• ↑ BDNF, 30min<br>• ↑ ARC, 30min<br>• ↓ p-eEF2, 30 min<br>• = p-mTOR                                                                   | IP                  | Whole Tissue                       | ↑ BDNF protein, but not mRNA (regulation at the level of translation).                                                                                                                                                                                |
| (Carrier and Kabbaj, 2013) | Rat    | Sprague Dawley | M   | 2.5, 5<br><i>(R,S)-ketamine</i>    | Naïve           | 30min                                     | <u>Whole Tissue</u><br><i>mPFC</i><br>• = total mTOR<br>• = p-mTOR<br><i>HC</i><br>• ↓ p-eEF2 (5)<br><u>Synaptoneuroosomes</u><br><i>mPFC</i><br>• ↑ p-mTOR (5)<br>• Synaptoneuroosomes with ↑ p-mTOR were also highly concentrated with PSD-95 | IP                  | Synaptoneuroosomes<br>Whole Tissue |                                                                                                                                                                                                                                                       |
| (Carrier and Kabbaj, 2013) | Rat    | Sprague Dawley | F   | 2.5, 5<br><i>(R,S)-ketamine</i>    | Naïve           | 30min                                     | <u>Whole Tissue</u><br><i>mPFC</i><br>• = total mTOR<br>• = p-mTOR<br><i>HC</i><br>• = p-eEF2<br><u>Synaptoneuroosomes</u><br><i>mPFC</i><br>• ↑ p-mTOR (5)<br>• Synaptoneuroosomes with ↑ p-mTOR were also highly concentrated with PSD-95     | IP                  | Synaptoneuroosomes<br>Whole Tissue | No increase in activated mTOR irt (2.5), suggesting that the increased sensitivity to ketamine is not due to mTOR/eEF2 activation in the PFC of female rat. Increased sensitivity lost when female rats are OVX. Estrus cycle not taken into account. |
| (Chang et al., 2018)       | Mouse  | C57BL/6J       | M/F | 3, 10<br><i>(R)-ketamine</i>       | LPS             | 10, 30, 60, 120, 180                      | No differences between M/F in terms of acute pharmacokinetic profiles.                                                                                                                                                                          | IP                  | Plasma<br>Brain (Whole Tissue)     | Estrus cycle not taken into account.                                                                                                                                                                                                                  |

| Citation                     | Animal | Strain   | M/F | Dose in mg/kg<br><i>Enantiomer</i> | Stress<br>Model | Time of Testing<br>(after last injection) | Molecular Changes,<br>time (dose)                                                                                                                                                                                                                                                                                                                                                                                                                                                                                                                                                                                                                                                                                                                                                                                                                                       | Injection<br>Method | Tissue Collection<br>Method | Special<br>Notes/Considerations                                                                                                                                                                                                                                 |
|------------------------------|--------|----------|-----|------------------------------------|-----------------|-------------------------------------------|-------------------------------------------------------------------------------------------------------------------------------------------------------------------------------------------------------------------------------------------------------------------------------------------------------------------------------------------------------------------------------------------------------------------------------------------------------------------------------------------------------------------------------------------------------------------------------------------------------------------------------------------------------------------------------------------------------------------------------------------------------------------------------------------------------------------------------------------------------------------------|---------------------|-----------------------------|-----------------------------------------------------------------------------------------------------------------------------------------------------------------------------------------------------------------------------------------------------------------|
| (Dossat et al., 2018)        | Mouse  | C57BL/6J | M   | 1.5, 3<br><i>(R,S)-ketamine</i>    | Naïve           | 1h                                        | <p><i>PFC</i></p> <ul style="list-style-type: none"> <li>• = p-CaMKII<math>\alpha</math></li> <li>• <math>\uparrow</math> p-GluR1 (3)</li> <li>• <math>\uparrow</math> BDNF (3)</li> <li>• = p-MAPK</li> <li>• <math>\uparrow</math> p-Akt (3)</li> <li>• <math>\uparrow</math> p-GSK3<math>\beta</math> (1.5, 3)</li> <li>• <math>\uparrow</math> p-mTOR (3)</li> </ul> <p><i>HC</i></p> <ul style="list-style-type: none"> <li>• <math>\uparrow</math> CaMKII<math>\alpha</math> (3)</li> <li>• <math>\uparrow</math> p-GluR1 (3)</li> <li>• <math>\uparrow</math> BDNF (3)</li> <li>• <math>\uparrow</math> p-MAPK (3)</li> <li>• <math>\uparrow</math> p-Akt (3)</li> <li>• <math>\uparrow</math> p-GSK3<math>\beta</math> (1.5, 3)</li> <li>• <math>\uparrow</math> p-mTOR (3)</li> </ul>                                                                          | IP                  | Whole Tissue                |                                                                                                                                                                                                                                                                 |
| (Dossat et al., 2018)        | Mouse  | C57BL/6J | F   | 1.5, 3<br><i>(R,S)-ketamine</i>    | Naïve           | 1h                                        | <p><i>PFC</i></p> <ul style="list-style-type: none"> <li>• = CaMKII<math>\alpha</math></li> <li>• <math>\uparrow</math> GluR1 (PE: 1.5, 3)</li> <li>• <math>\uparrow</math> BDNF (PE: 3)</li> <li>• = p-MAPK</li> <li>• <math>\uparrow</math> p-Akt (PE: 1.5, 3)</li> <li>• <math>\uparrow</math> p-GSK3<math>\beta</math> (PE: 3)</li> <li>• <math>\uparrow</math> p-mTOR (D1: 3)</li> </ul> <p><i>HC</i></p> <ul style="list-style-type: none"> <li>• <math>\uparrow</math> CaMKII<math>\alpha</math> (PE: 1.5, 3)</li> <li>• <math>\uparrow</math> p-GluR1 (PE: 3)</li> <li>• <math>\uparrow</math> BDNF (D1: 3)</li> <li>• <math>\uparrow</math> p-MAPK (D1: 1.5, 3; PE: 3)</li> <li>• <math>\uparrow</math> p-Akt (PE: 1.5, 3)</li> <li>• <math>\uparrow</math> p-GSK3<math>\beta</math> (D1: 3; PE: 3)</li> <li>• <math>\uparrow</math> p-mTOR (PE: 3)</li> </ul> | IP                  | Whole Tissue                | <p>Giving an ER<math>\alpha</math>/<math>\beta</math> agonist was sufficient to increase behavioural sensitivity in D1 females.</p> <p>Increased sensitivity in PE is mirrored by activation of Akt in the PFC and Akt/CaMKII<math>\alpha</math> in the HC.</p> |
| (Franceschelli et al., 2015) | Mouse  | C57BL/6J | M   | 10<br><i>(R,S)-ketamine</i>        | Naïve           | 30min, 24h                                | <p><i>PFC</i></p> <ul style="list-style-type: none"> <li>• = Asp</li> <li>• = 5-HIAA/5-HT</li> </ul> <p><i>HC</i></p> <ul style="list-style-type: none"> <li>• <math>\downarrow</math> Glu, 30min</li> <li>• = 5-HIAA/5-HT</li> </ul>                                                                                                                                                                                                                                                                                                                                                                                                                                                                                                                                                                                                                                   | IP                  | Whole Tissue                |                                                                                                                                                                                                                                                                 |
| (Franceschelli et al., 2015) | Mouse  | C57BL/6J | F   | 10<br><i>(R,S)-ketamine</i>        | Naïve           | 30min, 24h                                | <p><i>PFC</i></p> <ul style="list-style-type: none"> <li>• <math>\uparrow</math> Asp, 30min</li> <li>• <math>\downarrow</math> 5-HIAA/5-HT, 24h</li> </ul> <p><i>HC</i></p> <ul style="list-style-type: none"> <li>• = Glu</li> <li>• <math>\downarrow</math> 5-HIAA/5-HT, 24h</li> </ul>                                                                                                                                                                                                                                                                                                                                                                                                                                                                                                                                                                               | IP                  | Whole Tissue                | Estrus cycle not taken into account.                                                                                                                                                                                                                            |

| Citation               | Animal | Strain         | M/F | Dose in mg/kg<br><i>Enantiomer</i>                    | Stress<br>Model | Time of Testing<br>(after last injection) | Molecular Changes,<br>time (dose)                                                                                                                                                                                          | Injection<br>Method | Tissue Collection<br>Method | Special<br>Notes/Considerations                                                                                                                                                       |
|------------------------|--------|----------------|-----|-------------------------------------------------------|-----------------|-------------------------------------------|----------------------------------------------------------------------------------------------------------------------------------------------------------------------------------------------------------------------------|---------------------|-----------------------------|---------------------------------------------------------------------------------------------------------------------------------------------------------------------------------------|
| (Garcia et al., 2008a) | Rat    | Wistar         | M   | 5, 10, 15; 14d<br>Once Daily<br><i>(R,S)-ketamine</i> | Naïve           | Day 14                                    | <i>HC</i><br>• = BDNF                                                                                                                                                                                                      | IP                  | Whole Tissue                |                                                                                                                                                                                       |
| (Garcia et al., 2008b) | Rat    | Wistar         | M   | 5, 10, 15<br><i>(R,S)-ketamine</i>                    | Naïve           | 60min                                     | <i>HC</i><br>• ↑ BDNF (15)                                                                                                                                                                                                 | IP                  | Whole Tissue                |                                                                                                                                                                                       |
| (Garcia et al., 2009)  | Rat    | Wistar         | M   | 15; acute<br><i>(R,S)-ketamine</i>                    | Naïve           | NS                                        | • = ACTH<br>• = Corticosterone<br><i>HC</i><br>• = BDNF                                                                                                                                                                    | IP                  | Whole Tissue                |                                                                                                                                                                                       |
| (Garcia et al., 2009)  | Rat    | Wistar         | M   | 15; 7d<br>Once Daily<br><i>(R,S)-ketamine</i>         | Naïve           | NS                                        | • = ACTH<br>• = Corticosterone<br><i>HC</i><br>• = BDNF                                                                                                                                                                    | IP                  | Whole Tissue                | Larger differences in chronic than acute ketamine administration.                                                                                                                     |
| (Garcia et al., 2009)  | Rat    | Wistar         | M   | 15; acute<br><i>(R,S)-ketamine</i>                    | CMS             | NS                                        | • ↓ ACTH<br>• ↓ Corticosterone<br><i>HC</i><br>• = BDNF                                                                                                                                                                    | IP                  | Whole Tissue                |                                                                                                                                                                                       |
| (Garcia et al., 2009)  | Rat    | Wistar         | M   | 15; 7d<br>Once Daily<br><i>(R,S)-ketamine</i>         | CMS             | NS                                        | • ↓ ACTH (more than acute)<br>• ↓ Corticosterone (more than acute)<br><i>HC</i><br>• = BDNF                                                                                                                                | IP                  | Whole Tissue                | Larger differences in chronic than acute ketamine administration.                                                                                                                     |
| (Guo et al., 2016)     | Rat    | Sprague Dawley | M/F | 6-14; 9d<br>(Once daily)<br><i>(R,S)-ketamine</i>     | Naïve           | 0d, 1d, 3d, 5d, 7d, 9d, 10, 12d, 14d, 16d | "Metabolic trajectory fluctuation of the female rats was relatively larger than that of male rats."<br>"Different metabolites between ketamine-induced male and female rats."                                              | NS                  | Urine (Metabolics)          | Estrus cycle not taken into account.                                                                                                                                                  |
| (Li et al., 2010)      | Rat    | Sprague Dawley | M   | 10<br><i>(R,S)-ketamine</i>                           | IES             | 30min, 1h, 2h, 6h, 72h                    | <i>PFC</i><br>• ↑ p-mTOR, 30min-1h<br>• ↑ p-4E-BP, 30min-1h<br>• ↑ p-p70S6K, 30min-1h<br>• ↑ p-ERK, 30min-1h<br>• ↑ p-Akt, 30min-1h<br>• ↑ ARC, 1h-2h<br>• ↑ Synapsin-1, 2h-72h<br>• ↑ PSD-95, 2h-72h<br>• ↑ GluR1, 2h-72h | IP                  | Synaptoneuroosomes          | Pharmacological inhibition of ERK or Akt blocked ketamine-induction of phosphorylated 4E-BP, mTOR, and p70S6K. Rapamycin blocked ketamine-induction of PSD-95, GluR1, and Synapsin-1. |
| (Li et al., 2011)      | Rat    | Sprague Dawley | M   | 10<br><i>(R,S)-ketamine</i>                           | CUS             | 8d                                        | <i>PFC</i><br>• ↑ Synapsin-1, PSD-95, GluR1                                                                                                                                                                                | IP                  | Synaptoneuroosomes          |                                                                                                                                                                                       |

| Citation                 | Animal | Strain    | M/F | Dose in mg/kg<br><i>Enantiomer</i> | Stress<br>Model | Time of Testing<br>(after last injection) | Molecular Changes,<br>time (dose)                                                                                            | Injection<br>Method | Tissue Collection<br>Method         | Special<br>Notes/Considerations                                                                                   |
|--------------------------|--------|-----------|-----|------------------------------------|-----------------|-------------------------------------------|------------------------------------------------------------------------------------------------------------------------------|---------------------|-------------------------------------|-------------------------------------------------------------------------------------------------------------------|
| (Nishitani et al., 2014) | Rat    | Wistar/ST | M   | 1, 5, 25<br><i>(R,S)-ketamine</i>  | Naïve           | Every 10min for 60min                     | <i>mPFC</i><br>• ↑ 5-HT, 10min-40min (5)<br>• ↑ 5-HT, 10min-50min (25)                                                       | SC                  | In vivo measurement via cannulation | Increase in 5-HT in the mPFC was through AMPAR activation. NBQX attenuated the increase in ketamine-induced 5-HT. |
| (Paul et al., 2014)      | Rat    | Wistar    | M   | 40<br><i>(R,S)-ketamine</i>        | Naïve           | 30min, 60min, 240min                      | <i>PFC</i><br>• ↑ p-mTOR, 30min-60min<br>• ↑ p-p70S6K, 30min-60min<br>• = p-4E-BP<br>• = p-ERK<br>• = p-Akt                  | IP                  | Whole tissue                        |                                                                                                                   |
| (Paul et al., 2014)      | Rat    | Wistar    | M   | 20<br><i>(R,S)-NK</i>              | Naïve           | 20min, 60min, 240min                      | <i>PFC</i><br>• ↑ p-mTOR, 20min-60min<br>• ↑ p-p70S6K, 20min-60min<br>• ↑ p-4E-BP, 60min<br>• ↑ p-ERK, 20-60min<br>• = p-Akt | IP                  | Whole Tissue                        |                                                                                                                   |
| (Paul et al., 2014)      | Rat    | Wistar    | M   | 20<br><i>(R,S)-HNK</i>             | Naïve           | 20min, 60min, 240min                      | <i>PFC</i><br>• ↑ p-mTOR, 20min<br>• ↑ p-p70S6K, 20min-60min<br>• ↑ p-4E-BP, 20min-60min<br>• = p-ERK<br>• = p-Akt           | IP                  | Whole Tissue                        |                                                                                                                   |

| Citation                  | Animal | Strain         | M/F | Dose in mg/kg<br><i>Enantiomer</i>                   | Stress Model | Time of Testing<br>(after last injection) | Molecular Changes,<br>time (dose)                                                                                                                                                                                                                                                                                                                                                                                                                                                                                                                                                                   | Injection Method | Tissue Collection Method          | Special Notes/Considerations                                                                                                                                                                                                                               |
|---------------------------|--------|----------------|-----|------------------------------------------------------|--------------|-------------------------------------------|-----------------------------------------------------------------------------------------------------------------------------------------------------------------------------------------------------------------------------------------------------------------------------------------------------------------------------------------------------------------------------------------------------------------------------------------------------------------------------------------------------------------------------------------------------------------------------------------------------|------------------|-----------------------------------|------------------------------------------------------------------------------------------------------------------------------------------------------------------------------------------------------------------------------------------------------------|
| (Saland and Kabbaj, 2018) | Rat    | Sprague Dawley | M/F | 2.5<br><i>(R,S)-ketamine</i>                         | Naïve        | NS                                        | <ul style="list-style-type: none"> <li>• Peak plasma concentrations of K/NK higher and established earlier in females than males.</li> <li>• Peak plasma concentrations of DNHK higher and established earlier in males than females.</li> <li>• NK higher in the PFC and HC in females</li> <li>• Distribution or permeability of NK into the brain is greater in females than males</li> <li>• Males have slower elimination or greater retention of ketamine in the brain.</li> <li>• Both K/NK concentrations were higher in the PFC than HC for females; roughly the same for males</li> </ul> | IP               | Plasma<br>Whole Tissue<br>(Brain) | Pharmacokinetic study. There were no sig differences in drug/metabolite localization due to stage of the estrus cycle, supporting a dynamic rather than kinetic influence.                                                                                 |
| (Saland et al., 2016)     | Rat    | Sprague Dawley | M   | 2.5; on days 4 and 6 (of 6)<br><i>(R,S)-ketamine</i> | Naïve        | 24h-7d<br>Tested once daily               | <i>HC</i> <ul style="list-style-type: none"> <li>• = BDNF</li> <li>• = p-ERK</li> <li>• = p-Akt</li> </ul>                                                                                                                                                                                                                                                                                                                                                                                                                                                                                          | IP               | Whole Tissue                      |                                                                                                                                                                                                                                                            |
| (Saland et al., 2016)     | Rat    | Sprague Dawley | F   | 2.5; on days 4 and 6 (of 6)<br><i>(R,S)-ketamine</i> | Naïve        | 24h-7d<br>Tested once daily               | <i>HC</i> <ul style="list-style-type: none"> <li>• ↑ BDNF, 24h</li> <li>• = p-ERK</li> <li>• = p-Akt</li> </ul>                                                                                                                                                                                                                                                                                                                                                                                                                                                                                     | IP               | Whole Tissue                      | Suggests that the increase in response of females to ketamine is not due to ERK/Akt activation in the HC. Differences could be due to organizational differences of E2/P4 w/in the HC. OVX animals with E2/P4 hormone replacement to physiological levels. |
| (Sarkar and Kabbaj, 2016) | Rat    | Sprague Dawley | M   | 2.5, 5<br><i>(R,S)-ketamine</i>                      | CSIS         | 1h after FST (3d)                         | <i>mPFC</i> <ul style="list-style-type: none"> <li>• ↑ Synapsin-1 (5)</li> <li>• ↑ PSD-95 (5)</li> <li>• ↑ GluR1 (5)</li> </ul>                                                                                                                                                                                                                                                                                                                                                                                                                                                                     | NS               | Synaptoneurosomes                 |                                                                                                                                                                                                                                                            |

| Citation                  | Animal | Strain         | M/F | Dose in mg/kg<br><i>Enantiomer</i>                          | Stress<br>Model | Time of Testing<br>(after last injection) | Molecular Changes,<br>time (dose)                                                                                       | Injection<br>Method | Tissue Collection<br>Method | Special<br>Notes/Considerations                                                                                                                                    |
|---------------------------|--------|----------------|-----|-------------------------------------------------------------|-----------------|-------------------------------------------|-------------------------------------------------------------------------------------------------------------------------|---------------------|-----------------------------|--------------------------------------------------------------------------------------------------------------------------------------------------------------------|
| (Sarkar and Kabbaj, 2016) | Rat    | Sprague Dawley | F   | 2.5, 5<br><i>(R,S)-ketamine</i>                             | CSIS            | 1h after FST (3d)                         | <i>mPFC</i><br>• = Synapsin-1<br>• = PSD-95<br>• = GluR1                                                                | NS                  | Synaptoneurosomes           | Females injected with ketamine during D1.                                                                                                                          |
| (Schoepfer et al., 2019)  | Rat    | Sprague Dawley | M   | 2.5, 5, 10; 10d<br>Every other day<br><i>(R,S)-ketamine</i> | Naïve           | Day 12                                    | <i>NAc</i><br>• ↑ ΔFosB (2.5, 5, 10)                                                                                    | IP                  | Whole Tissue                | No sex differences in protein expression within each dose level.                                                                                                   |
| (Schoepfer et al., 2019)  | Rat    | Sprague Dawley | F   | 2.5, 5, 10; 10d<br>Every other day<br><i>(R,S)-ketamine</i> | Naïve           | Day 12                                    | <i>NAc</i><br>• ↑ ΔFosB (2.5, 5, 10)                                                                                    | IP                  | Whole Tissue                | ΔFosB expression was greater in females than in males.<br>No sex differences in protein expression within each dose level.<br>Estrus cycle not taken into account. |
| (Strong et al., 2017)     | Rat    | Sprague Dawley | M   | 2.5, 5; 1/wk for<br>7 wk<br><i>(R,S)-ketamine</i>           | Naïve           | 2h after ketamine challenge (2wk)         | <i>NAc</i><br>• ↑ ΔFosB (5)<br>• ↑ CaMKIIα (5)<br>• = p-CaMKIIα<br>• ↑ BDNF (5)<br>• ↑ GluR1 (5, trend)                 | IP                  | Whole Tissue                | Increased expression of proteins associated with sensitization in males but not females.                                                                           |
| (Strong et al., 2017)     | Rat    | Sprague Dawley | F   | 2.5, 5; 1/wk for<br>7 wk<br><i>(R,S)-ketamine</i>           | Naïve           | 2h after ketamine challenge (2wk)         | <i>NAc</i><br>• = ΔFosB<br>• = CaMKIIα<br>• = p-CaMKIIα<br>• = BDNF<br>• ↑ GluR1 (5)                                    | IP                  | Whole Tissue                | All females were tested in D1.                                                                                                                                     |
| (Thelen et al., 2016)     | Mouse  | C57BL/6J       | M   | 3, 5, 10; 21 d<br>Once daily<br><i>(R,S)-ketamine</i>       | Naïve           | Day 22                                    | <i>HC</i><br>• = Glu<br>• = Asp<br>• ↑ 5-HIAA (10)<br>• ↑ 5-HIAA/5-HT (10)<br>• ↑ Synapsin-1 (10)<br>• ↑ SNARE-100 (10) | IP                  | Synaptoneurosomes           |                                                                                                                                                                    |
| (Thelen et al., 2016)     | Mouse  | C57BL/6J       | F   | 3, 5, 10; 21 d<br>Once daily<br><i>(R,S)-ketamine</i>       | Naïve           | Day 22                                    | <i>HC</i><br>• ↓ Glu (10)<br>• ↓ Asp (10)<br>• = 5-HIAA<br>• = 5-HIAA/5-HT<br>• = Synapsin-1<br>• = SNARE-100           | IP                  | Synaptoneurosomes           | Estrus cycle not taken into account.                                                                                                                               |

| Citation              | Animal | Strain             | M/F | Dose in mg/kg<br><i>Enantiomer</i>               | Stress<br>Model | Time of Testing<br>(after last injection)                       | Molecular Changes,<br>time (dose)                                                                                                                                                                                | Injection<br>Method | Tissue Collection<br>Method | Special<br>Notes/Considerations                                                                 |
|-----------------------|--------|--------------------|-----|--------------------------------------------------|-----------------|-----------------------------------------------------------------|------------------------------------------------------------------------------------------------------------------------------------------------------------------------------------------------------------------|---------------------|-----------------------------|-------------------------------------------------------------------------------------------------|
| (Thelen et al., 2019) | Mouse  | C57BL/6J           | M   | 10<br><i>(R,S)-ketamine</i>                      | Naïve           | Every 10min for 60min (Glu)<br>0.5h, 4h, 24h, 3d, 7d (Proteins) | <i>mPFC</i><br>• ↑ Glu, 10min; burst<br>• ↑ p-mTOR, 0.5h-24h<br>• ↑ GluR1, 4h<br>• ↑ GluR2, 4h-24h<br><i>HC</i><br>• = p-mTOR<br>• ↑ GluR1, 4h                                                                   | IP                  | Synaptoneuroosomes          |                                                                                                 |
| (Thelen et al., 2019) | Mouse  | C57BL/6J           | F   | 10<br><i>(R,S)-ketamine</i>                      | Naïve           | Every 10min for 60min (Glu)<br>0.5h, 4h, 24h, 3d, 7d (Proteins) | <i>mPFC</i><br>• = Glu release<br>• ↓ p-mTOR, 4h<br>• = GluR1<br>• = GluR2<br><i>HC</i><br>• = p-mTOR<br>• = GluR1                                                                                               | IP                  | Synaptoneuroosomes          | Estrus cycle not taken into account.                                                            |
| (Tizabi et al., 2012) | Rat    | Wistar-Kyoto (WKY) | F   | 0.5; 10d<br>Once daily<br><i>(R,S)-ketamine</i>  | Naïve           | 20h                                                             | <i>HC</i><br>• ↑ AMPAR densities<br>• ↑ AMPAR/NMDAR ratio                                                                                                                                                        | IP                  | Whole Tissue                |                                                                                                 |
| (Tizabi et al., 2012) | Rat    | Wistar             | F   | 0.5; 10d<br>Once daily<br><i>(R,S)-ketamine</i>  | Naïve           | 20h                                                             | <i>HC</i><br>• = AMPAR densities<br>• = AMPAR/NMDAR ratio                                                                                                                                                        | IP                  | Whole Tissue                |                                                                                                 |
| (Yang et al., 2015)   | Mouse  | C57BL/6            | M   | 10<br><i>(R)-ketamine</i><br><i>(S)-ketamine</i> | SDS             | 7d                                                              | <i>mPFC</i><br>• ↑ BDNF<br>• ↑ GluR1<br><i>HC</i><br>• ↑ CA3/DG BDNF<br>• ↑ GluR1<br>(R)-ketamine more potent on altering BDNF, but have similar effects on GluR1                                                | IP                  | Whole Tissue                | (R)-ketamine more potent than (S)-ketamine.                                                     |
| (Yang et al., 2018)   | Mice   | C57BL/6            | M   | 10<br><i>(R)-ketamine</i>                        | CSDS            | 30min                                                           | <i>PFC</i><br>• = p-mTOR<br>• = p-p70S6K<br>• = GluR1<br>• = BDNF<br>• ↓ p-eEF2<br>• ↑ p-ERK<br>• ↑ p-MEK<br><i>HC</i><br>• = CA3/DG p-mTOR<br>• ↓ DG p-mTOR<br>• = p-p70S6K<br>• ↑ CA3/DG p-ERK<br>• ↑ DG p-MEK | IP                  | Whole Tissue                | ERK may play a role in the AD effects of (R)-ketamine, but not (S)-ketamine, in the CSDS model. |

| Citation                | Animal | Strain   | M/F | Dose in mg/kg<br><i>Enantiomer</i> | Stress<br>Model | Time of Testing<br>(after last injection) | Molecular Changes,<br>time (dose)                                                                                                                                                                                                                                                                                                                                                                                                                                                                                                                            | Injection<br>Method | Tissue Collection<br>Method | Special<br>Notes/Considerations                                                                  |
|-------------------------|--------|----------|-----|------------------------------------|-----------------|-------------------------------------------|--------------------------------------------------------------------------------------------------------------------------------------------------------------------------------------------------------------------------------------------------------------------------------------------------------------------------------------------------------------------------------------------------------------------------------------------------------------------------------------------------------------------------------------------------------------|---------------------|-----------------------------|--------------------------------------------------------------------------------------------------|
| (Yang et al.,<br>2018)  | Mice   | C57BL/6  | M   | 10<br><i>(S)-ketamine</i>          | CSDS            | 30min                                     | <p><i>PFC</i></p> <ul style="list-style-type: none"> <li>• ↑ p-mTOR</li> <li>• ↑ p-p70S6K</li> <li>• = GluR1</li> <li>• = BDNF</li> <li>• ↓ p-eEF2</li> <li>• = p-ERK</li> <li>• = p-MEK</li> </ul> <p><i>HC</i></p> <ul style="list-style-type: none"> <li>• ↑ CA3/DG p-mTOR</li> <li>• = DG p-mTOR</li> <li>• = p-p70S6K</li> <li>• = CA3/DG p-ERK</li> <li>• = DG p-MEK</li> </ul>                                                                                                                                                                        | IP                  | Whole Tissue                | mTOR may play a role in the AD effects of (S)-ketamine, but not (R)-ketamine, in the CSDS model. |
| (Zanos et al.,<br>2016) | Mouse  | C57BL/6J | M/F | 10<br><i>(R,S)-ketamine</i>        | CSDS            | 1h, 24h                                   | <ul style="list-style-type: none"> <li>• Equivalent levels of ketamine and norketamine in males and females</li> <li>• 3x higher (2S,6S;2R,6R)-HNK in the brains of females than males</li> </ul> <p>Males:</p> <p><i>PFC</i></p> <ul style="list-style-type: none"> <li>• = p-mTOR</li> <li>• = p-eEF2</li> <li>• = BDNF</li> <li>• = GluR1</li> <li>• = GluR2</li> </ul> <p><i>HC</i></p> <ul style="list-style-type: none"> <li>• = p-mTOR</li> <li>• ↓ p-eEF2, 1h, 24h</li> <li>• ↑ BDNF, 24h</li> <li>• ↑ GluR1, 24h</li> <li>• ↑ GluR2, 24h</li> </ul> | IP                  | Synaptoneurosome            | Estrus cycle not taken into account.                                                             |



| Citation                | Animal | Strain   | M/F | Dose in mg/kg<br><i>Enantiomer</i>             | Stress<br>Model | Time of Testing<br>(after last injection) | Molecular Changes,<br>time (dose)                                                                                                                                                        | Injection<br>Method | Tissue Collection<br>Method | Special<br>Notes/Considerations                                                                                                                                                                                                                                                                |
|-------------------------|--------|----------|-----|------------------------------------------------|-----------------|-------------------------------------------|------------------------------------------------------------------------------------------------------------------------------------------------------------------------------------------|---------------------|-----------------------------|------------------------------------------------------------------------------------------------------------------------------------------------------------------------------------------------------------------------------------------------------------------------------------------------|
| (Zanos et al.,<br>2016) | Mouse  | C57BL/6J | M/F | 10<br><i>(2R,6R)-HNK</i><br><i>(2S,6S)-HNK</i> | CSDS            | 1h, 24h                                   | <i>(2R,6R)-HNK</i><br><i>PFC</i><br>• = p-mTOR<br>• = p-eEF2<br>• = GluR1<br>• = GluR2<br><i>HC</i><br>• = p-mTOR<br>• ↓ p-eEF2, 1h, 24h<br>• ↑ BDNF, 24h<br>• ↑ GluR1, 24h<br>• ↑ GluR2 | IP                  | Synaptoneurosomes           | <i>(2R,6R)-HNK</i> more potent than <i>(2S,6S)-HNK</i> .<br><i>(2R,6R)-HNK</i> does not inhibit NMDARs.<br><i>(2R,6R)-HNK</i> requires AMPARs for its antidepressant effects (abolished by NBQX).<br><i>(2R,6R)-HNK</i> lacks ketamine's side effects.<br>Estrus cycle not taken into account. |

### List of Abbreviations

---

#### Stress Model Abbreviations

#### Other Abbreviations

---

CMS: Chronic Mild Stress

CSDS: Chronic Social Defeat Stress

CSIS: Chronic Social Isolation Stress

CUS: Chronic Unpredictable Stress

ES: Emotional/Psychological Stress

IES: Inescapable Shock

LPS: Lipopolysaccharide Inflammation

SDS: Social Defeat Stress

US: Uncontrollable Stress

(m)(dl)PFC: (medial)(dorsolateral) Prefrontal Cortex

D1: Diestrus

HC: Hippocampus

IP: Intraperitoneal

IV: Intravenous

NAcC: Nucleus Accumbens Core

NAcSh: Nucleus Accumbens Shell

NS: Not Specified

PE: Proestrus

---

## References

- Autry AE, Adachi M, Nosyreva E, Na ES, Los MF, Cheng P, Kavalali ET, Monteggia LM (2011) NMDA receptor blockade at rest triggers rapid behavioural antidepressant responses. *Nature* 475:91–95.
- Carrier N, Kabbaj M (2013) Sex differences in the antidepressant-like effects of ketamine. *Neuropharmacology* 70:27–34.
- Chang L, Toki H, Qu Y, Fujita Y, Mizuno-Yasuhira A, Yamaguchi J-I, Chaki S, Hashimoto K (2018) No Sex-Specific Differences in the Acute Antidepressant Actions of (R)-Ketamine in an Inflammation Model. *Int J Neuropsychopharmacol* 21:932–937.
- Dossat AM, Wright KN, Strong CE, Kabbaj M (2018) Behavioral and biochemical sensitivity to low doses of ketamine: influence of estrous cycle in C57BL/6 mice. *Neuropharmacology* 130:30–41.
- Franceschelli A, Sens J, Herchick S, Thelen C, Pitychoutis PM (2015) Sex differences in the rapid and the sustained antidepressant-like effects of ketamine in stress-naïve and “depressed” mice exposed to chronic mild stress. *Neuroscience* 290:49–60.
- Garcia LS, Comim CM, Valvassori SS, Réus GZ, Andreazza AC, Stertz L, Fries GR, Gavioli EC, Kapczinski F, Quevedo J (2008a) Chronic Administration of Ketamine Elicits Antidepressant-Like Effects in Rats without Affecting Hippocampal Brain-Derived Neurotrophic Factor Protein Levels. *Basic Clin Pharmacol Toxicol* 103:502–506.
- Garcia LS, Comim CM, Valvassori SS, Réus GZ, Barbosa LM, Andreazza AC, Stertz L, Fries GR, Gavioli EC, Kapczinski F, Quevedo J (2008b) Acute administration of ketamine induces antidepressant-like effects in the forced swimming test and increases BDNF levels in the rat hippocampus. *Prog Neuro-Psychopharmacol Biol Psychiatry* 32:140–144.
- Garcia LS, Comim CM, Valvassori SS, Réus GZ, Stertz L, Kapczinski F, Gavioli EC, Quevedo J (2009) Ketamine treatment reverses behavioral and physiological alterations induced by chronic mild stress in rats. *Prog Neuro-Psychopharmacol Biol Psychiatry* 33:450–455.
- Guo R, Tang Q, Ye Y, Lu X, Chen F, Dai X, Yan Y, Liao L (2016) Effects of gender on ketamine-induced conditioned place preference and urine metabonomics. *Regul Toxicol Pharmacol* 77:263–274.

- Li N, Lee B, Liu R-J, Banasr M, Dwyer JM, Iwata M, Li X-Y, Aghajanian G, Duman RS (2010) mTOR-dependent synapse formation underlies the rapid antidepressant effects of NMDA antagonists. *Science* 329:959–964.
- Li N, Liu R-J, Dwyer JM, Banasr M, Lee B, Son H, Li X-Y, Aghajanian G, Duman RS (2011) Glutamate NMDA receptor antagonists rapidly reverse behavioral and synaptic deficits caused by chronic stress exposure. *Biol Psychiatry* 69:754–761.
- Nishitani N, Nagayasu K, Asaoka N, Yamashiro M, Shirakawa H, Nakagawa T, Kaneko S (2014) Raphe AMPA receptors and nicotinic acetylcholine receptors mediate ketamine-induced serotonin release in the rat prefrontal cortex. *Int J Neuropsychopharmacol* 17:1321–1326.
- Paul RK, Singh NS, Khadeer M, Moaddel R, Sanghvi M, Green CE, O’Loughlin K, Torjman MC, Bernier M, Wainer IW (2014) (R,S)-Ketamine metabolites (R,S)-norketamine and (2S,6S)-hydroxynorketamine increase the mammalian target of rapamycin function. *Anesthesiology* 121:149–159.
- Saland SK, Kabbaj M (2018) Sex Differences in the Pharmacokinetics of Low-dose Ketamine in Plasma and Brain of Male and Female Rats. *J Pharmacol Exp Ther* 367:393–404.
- Saland SK, Schoepfer KJ, Kabbaj M (2016) Hedonic sensitivity to low-dose ketamine is modulated by gonadal hormones in a sex-dependent manner. *Sci Rep* 6:21322.
- Sarkar A, Kabbaj M (2016) Sex Differences in Effects of Ketamine on Behavior, Spine Density, and Synaptic Proteins in Socially Isolated Rats. *Biol Psychiatry* 80:448–456.
- Schoepfer KJ, Strong CE, Saland SK, Wright KN, Kabbaj M (2019) Sex- and dose-dependent abuse liability of repeated subanesthetic ketamine in rats. *Physiol Behav* 203:60–69.
- Strong CE, Schoepfer KJ, Dossat AM, Saland SK, Wright KN, Kabbaj M (2017) Locomotor sensitization to intermittent ketamine administration is associated with nucleus accumbens plasticity in male and female rats. *Neuropharmacology* 121:195–203.
- Thelen C, Flaherty E, Saurine J, Sens J, Mohamed S, Pitychoutis PM (2019) Sex Differences in the Temporal Neuromolecular and Synaptogenic Effects of the Rapid-acting Antidepressant Drug Ketamine in the Mouse Brain. *Neuroscience* 398:182–192.

- Thelen C, Sens J, Mauch J, Pandit R, Pitychoutis PM (2016) Repeated ketamine treatment induces sex-specific behavioral and neurochemical effects in mice. *Behav Brain Res* 312:305–312.
- Tizabi Y, Bhatti BH, Manaye KF, Das JR, Akinfiresoye L (2012) Antidepressant-like effects of low ketamine dose is associated with increased hippocampal AMPA/NMDA receptor density ratio in female Wistar–Kyoto rats. *Neuroscience* 213:72–80.
- Yang C, Ren Q, Qu Y, Zhang J-C, Ma M, Dong C, Hashimoto K (2018) Mechanistic Target of Rapamycin–Independent Antidepressant Effects of (R)-Ketamine in a Social Defeat Stress Model. *Biol Psychiatry* 83:18–28.
- Yang C, Shirayama Y, Zhang J-C, Ren Q, Yao W, Ma M, Dong C, Hashimoto K (2015) R-ketamine: a rapid-onset and sustained antidepressant without psychotomimetic side effects. *Transl Psychiatry* 5:e632–e632.
- Zanos P et al. (2016) NMDAR inhibition-independent antidepressant actions of ketamine metabolites. *Nature* 533:481–486.
