# Supplementary material for: Sex Differences in the Behavioral, Molecular, and Structural Effects of Ketamine Treatment in Depression
Source: PubMed Central journal article supplement — Int J Neuropsychopharmacol. 2021 Nov 19;25(1):75–84. doi: 10.1093/ijnp/pyab082 (PMC8756094; doi:10.1093/ijnp/pyab082), 2021-11-19
Supplement: pyab082_suppl_supplementary_table_s3.pdf [file pyab082_suppl_supplementary_table_s3.pdf]

**Supplementary Table S3. Structural and Functional Effects of Ketamine in Preclinical Models**

| Citation                  | Animal | Strain         | M/F | Dose in mg/kg<br><i>Enantiomer</i>                                               | Stress<br>Model | Time of Testing (after<br>last injection) | Structural/Functional<br>Changes, time (dose)                                                                                                                                                                           | Injection<br>Method | Special<br>Notes/Considerations                                                                       |
|---------------------------|--------|----------------|-----|----------------------------------------------------------------------------------|-----------------|-------------------------------------------|-------------------------------------------------------------------------------------------------------------------------------------------------------------------------------------------------------------------------|---------------------|-------------------------------------------------------------------------------------------------------|
| (Garcia et al., 2009)     | Rat    | Wistar         | M   | 15; acute<br><i>(R,S)-ketamine</i>                                               | Naïve           | NS                                        | • ↑ Body weight<br>• = Adrenal weight                                                                                                                                                                                   | IP                  |                                                                                                       |
| (Garcia et al., 2009)     | Rat    | Wistar         | M   | 15; 7d<br>Once Daily<br><i>(R,S)-ketamine</i>                                    | Naïve           | NS                                        | • ↑ Body weight<br>• = Adrenal weight                                                                                                                                                                                   | IP                  |                                                                                                       |
| (Garcia et al., 2009)     | Rat    | Wistar         | M   | 15; acute<br><i>(R,S)-ketamine</i>                                               | CMS             | NS                                        | • ↑ Body weight<br>• ↓ Adrenal weight<br>(reversed CMS-induced<br>increase)                                                                                                                                             | IP                  |                                                                                                       |
| (Garcia et al., 2009)     | Rat    | Wistar         | M   | 15; 7d<br>Once Daily<br><i>(R,S)-ketamine</i>                                    | CMS             | NS                                        | • ↑ Body weight<br>• ↓ Adrenal weight<br>(reversed CMS-induced<br>increase)                                                                                                                                             | IP                  |                                                                                                       |
| (Gopinath et al., 2016)   | Monkey | Rhesus         | F   | 0.345 (1min<br>infusion) +<br>0.256 (53min<br>infusion)<br><i>(R,S)-ketamine</i> | Naïve           | 1h                                        | • ↑ Functional connectivity<br>to the dlPFC in several<br>(sub)cortical regions<br>• Hyperconnectivity in<br>functional brain networks<br>associated with emotional<br>regulation, cognitive<br>control, and motivation | IV                  | Consistent with human<br>imaging studies that<br>showed similar results.                              |
| (Li et al., 2010)         | Rat    | Sprague Dawley | M   | 10<br><i>(R,S)-ketamine</i>                                                      | IES             | 24h                                       | <i>PFC</i><br>• ↑ Spine density<br>• ↑ Mushroom spines                                                                                                                                                                  | IP                  |                                                                                                       |
| (Li et al., 2011)         | Rat    | Sprague Dawley | M   | 10<br><i>(R,S)-ketamine</i>                                                      | CUS             | 8d (Molecular)                            | <i>PFC</i><br>• ↑ Spine density                                                                                                                                                                                         | IP                  |                                                                                                       |
| (Sarkar and Kabbaj, 2016) | Rat    | Sprague Dawley | M   | 2.5, 5<br><i>(R,S)-ketamine</i>                                                  | CSIS            | 1h after FST (3d)                         | <i>mPFC</i><br>• ↑ Spine density (5)<br>• ↑ Thin spines (5)<br>• = Mushroom spines<br>• = Stubby spines                                                                                                                 | NS                  |                                                                                                       |
| (Sarkar and Kabbaj, 2016) | Rat    | Sprague Dawley | F   | 2.5, 5<br><i>(R,S)-ketamine</i>                                                  | CSIS            | 1h after FST (3d)                         | <i>mPFC</i><br>• = Spine Density<br>• = Thin spines<br>• = Mushroom spines<br>• = Stubby spines                                                                                                                         | NS                  | Females injected with<br>ketamine during D1.                                                          |
| (Strong et al., 2017)     | Rat    | Sprague Dawley | M   | 2.5, 5; 1/wk for<br>7 wk<br><i>(R,S)-ketamine</i>                                | Naïve           | 2h after ketamine<br>challenge (2wk)      | <i>NAcSh (Shell)</i><br>• ↑ Spine density (2.5, 5)<br><i>NAcC (Core)</i><br>• = Spine density                                                                                                                           | IP                  | Males who sensitized to<br>ketamine show an increase<br>in spine density in the<br>NAcSh but not NAcC |
| (Strong et al., 2017)     | Rat    | Sprague Dawley | F   | 2.5, 5; 1/wk for<br>7 wk<br><i>(R,S)-ketamine</i>                                | Naïve           | 2h after ketamine<br>challenge (2wk)      | <i>NAcSh</i><br>• ↑ Spine density (5)<br><i>NAcC</i><br>• ↑ Spine density (5)                                                                                                                                           | IP                  | All females were tested in<br>D1.                                                                     |

| Citation              | Animal | Strain   | M/F | Dose in mg/kg<br><i>Enantiomer</i>               | Stress<br>Model | Time of Testing (after<br>last injection) | Structural/Functional<br>Changes, time (dose)                                                                                             | Injection<br>Method | Special<br>Notes/Considerations                                                                                    |
|-----------------------|--------|----------|-----|--------------------------------------------------|-----------------|-------------------------------------------|-------------------------------------------------------------------------------------------------------------------------------------------|---------------------|--------------------------------------------------------------------------------------------------------------------|
| (Thelen et al., 2019) | Mouse  | C57BL/6J | M   | 10<br><i>(R,S)-ketamine</i>                      | Naïve           | 2h, 24h, 3d, 7d                           | <i>mPFC</i><br>• ↑ Spine density, 24h-7d<br><i>HC</i><br>• ↑ CA1/CA3 spine density,<br>24h                                                | IP                  |                                                                                                                    |
| (Thelen et al., 2019) | Mouse  | C57BL/6J | F   | 10<br><i>(R,S)-ketamine</i>                      | Naïve           | 2h, 24h, 3d, 7d                           | <i>mPFC</i><br>• = Spine density<br><i>HC</i><br>• ↑ CA1/CA3 spine density,<br>24h-3d                                                     | IP                  | Estrus cycle not taken into<br>account.<br>Increase in spine density<br>in the HC lasted longer in<br>female mice. |
| (Yang et al., 2015)   | Mouse  | C57BL/6  | M   | 10<br><i>(R)-ketamine</i><br><i>(S)-ketamine</i> | SDS             | 8d                                        | <i>mPFC</i><br>• ↑ Spine density<br><i>HC</i><br>• ↑ CA3/DG spine density<br>(R)-ketamine more potent<br>in the DG than (S)-<br>ketamine. | IP                  |                                                                                                                    |

### List of Abbreviations

---

#### Stress Model Abbreviations

#### Other Abbreviations

---

CMS: Chronic Mild Stress

CSDS: Chronic Social Defeat Stress

CSIS: Chronic Social Isolation Stress

CUS: Chronic Unpredictable Stress

ES: Emotional/Psychological Stress

IES: Inescapable Shock

LPS: Lipopolysaccharide Inflammation

SDS: Social Defeat Stress

US: Uncontrollable Stress

(m)(dl)PFC: (medial)(dorsolateral) Prefrontal Cortex

D1: Diestrus

HC: Hippocampus

IP: Intraperitoneal

IV: Intravenous

NAcC: Nucleus Accumbens Core

NAcSh: Nucleus Accumbens Shell

NS: Not Specified

PE: Proestrus

---

## References

- Garcia LS, Comim CM, Valvassori SS, Réus GZ, Stertz L, Kapczinski F, Gavioli EC, Quevedo J (2009) Ketamine treatment reverses behavioral and physiological alterations induced by chronic mild stress in rats. *Prog Neuro-Psychopharmacol Biol Psychiatry* 33:450–455.
- Gopinath K, Maltbie E, Urushino N, Kempf D, Howell L (2016) Ketamine-induced changes in connectivity of functional brain networks in awake female nonhuman primates: a translational functional imaging model. *Psychopharmacology* 233:3673–3684.
- Li N, Lee B, Liu R-J, Banasr M, Dwyer JM, Iwata M, Li X-Y, Aghajanian G, Duman RS (2010) mTOR-dependent synapse formation underlies the rapid antidepressant effects of NMDA antagonists. *Science* 329:959–964.
- Li N, Liu R-J, Dwyer JM, Banasr M, Lee B, Son H, Li X-Y, Aghajanian G, Duman RS (2011) Glutamate NMDA receptor antagonists rapidly reverse behavioral and synaptic deficits caused by chronic stress exposure. *Biol Psychiatry* 69:754–761.
- Sarkar A, Kabbaj M (2016) Sex Differences in Effects of Ketamine on Behavior, Spine Density, and Synaptic Proteins in Socially Isolated Rats. *Biol Psychiatry* 80:448–456.
- Strong CE, Schoepfer KJ, Dossat AM, Saland SK, Wright KN, Kabbaj M (2017) Locomotor sensitization to intermittent ketamine administration is associated with nucleus accumbens plasticity in male and female rats. *Neuropharmacology* 121:195–203.
- Thelen C, Flaherty E, Saurine J, Sens J, Mohamed S, Pitychoutis PM (2019) Sex Differences in the Temporal Neuromolecular and Synaptogenic Effects of the Rapid-acting Antidepressant Drug Ketamine in the Mouse Brain. *Neuroscience* 398:182–192.
- Yang C, Shirayama Y, Zhang J-C, Ren Q, Yao W, Ma M, Dong C, Hashimoto K (2015) R-ketamine: a rapid-onset and sustained antidepressant without psychotomimetic side effects. *Transl Psychiatry* 5:e632–e632.
